# Supplementary material for: Extraneuronal pathology in a canine model of CLN2 neuronal ceroid lipofuscinosis after intracerebroventricular gene therapy that delays neurological disease progression
Source: PubMed Central journal article supplement — Gene Ther. 2017 Feb 2;24(4):215–23. doi: 10.1038/gt.2017.4 (PMC5398942; doi:10.1038/gt.2017.4), 2017-02-02
Supplement: NIHMS840670-supplement-3.pdf [file NIHMS840670-supplement-3.pdf]

**Client**

WHITNEY YOUNG  
 MU VMTH SMALL ANIMAL RES.  
 900 E CAMPUS DR.  
 COLUMBIA, MO 65211

**Patient**

MCCARTNEY  
 DACHSHUND, LONGHAIRD STANDAR  
 MALE 0lb CANINE 5M

Completed 48 of 48 Results

**FINAL REPORT**

| Accession # | Item                               | Priority | Status   | Dates                                                                                                                                                                                          |
|-------------|------------------------------------|----------|----------|------------------------------------------------------------------------------------------------------------------------------------------------------------------------------------------------|
| D-1450111   | C-TROPONIN-I, CSF, SA CBC, SA MAXI | ROUTINE  | COMPLETE | <b>Requested:</b> 02/11/2014 01:29pm<br><b>Collection:</b> 02/11/2014 01:29pm<br><b>Received:</b> 02/11/2014 01:29pm<br><b>Needed:</b> 02/11/2014 01:29pm<br><b>Status:</b> 02/11/2014 04:28pm |
|             | <b>Owner:</b> KATZ, MARTIN         |          |          |                                                                                                                                                                                                |
|             | <b>Student:</b>                    |          |          |                                                                                                                                                                                                |
|             | <b>Comments:</b>                   |          |          |                                                                                                                                                                                                |

| TEST                 | RESULT                        | UNITS                  | REF RANGE    | RESULT DATETIME    |
|----------------------|-------------------------------|------------------------|--------------|--------------------|
| Small Animal CBC     | Specimen - Edta - Whole Blood |                        |              |                    |
| Plasma Protein       | 6.4                           | g/dL                   | 6 - 8        | 02/11/2014 03:12pm |
| WBC                  | 13.78                         | x10 <sup>3</sup> /uL   | 4.53 - 14.99 | 02/11/2014 03:12pm |
| RBC                  | 5.52                          | x10 <sup>6</sup> /uL   | 5.34 - 8.5   | 02/11/2014 03:12pm |
| Hgb                  | 12.8                          | g/dL                   | 12.3 - 19.7  | 02/11/2014 03:12pm |
| Hct                  | 37                            | %                      | 37 - 57      | 02/11/2014 03:12pm |
| MCV                  | 66                            | fL                     | 59 - 76      | 02/11/2014 03:12pm |
| MCH                  | 23.2                          | pg                     | 20.7 - 25.6  | 02/11/2014 03:12pm |
| MCHC                 | 35.1                          | g/dL                   | 32 - 36.4    | 02/11/2014 03:12pm |
| Platelet Count       | 364                           | x10 <sup>3</sup> /uL   | 200 - 500    | 02/11/2014 03:13pm |
| Segmented Neutrophil | 8.96                          | x10 <sup>3</sup> /uL   | 2.27 - 10.14 | 02/11/2014 03:13pm |
| Band Neutrophil      | 0.00                          | x10 <sup>3</sup> /uL   | 0 - .26      | 02/11/2014 03:13pm |
| Lymphocyte           | 1.10                          | x10 <sup>3</sup> /uL   | .76 - 4.23   | 02/11/2014 03:13pm |
| Monocyte             | 3.45                          | H x10 <sup>3</sup> /uL | .15 - 1.35   | 02/11/2014 03:13pm |
| Eosinophil           | 0.28                          | x10 <sup>3</sup> /uL   | .08 - 1.1    | 02/11/2014 03:13pm |
| Basophil             | 0.00                          | x10 <sup>3</sup> /uL   | No Ref Range | 02/11/2014 03:13pm |
| Reticulocyte Count   | 0.4                           | %                      | No Ref Range | 02/11/2014 03:13pm |

Small Animal CBC Specimen - Edta - Whole Blood

Sample Condition CLEAR

Morphology NORMAL RBCS

| TEST                   | RESULT                         | UNITS | REF RANGE    | RESULT DATETIME    |
|------------------------|--------------------------------|-------|--------------|--------------------|
| CSF Analysis           | Specimen - Cerebrospinal Fluid |       |              |                    |
| Volume                 | 0.4                            | ml    | No Ref Range | 02/11/2014 01:52pm |
| Pre Centrifuge Color   | COLORLESS                      |       | No Ref Range | 02/11/2014 01:52pm |
| Pre Centrifuge Clarity | CLEAR                          |       | No Ref Range | 02/11/2014 01:52pm |
| CSF RBC                | 0                              | /uL   | No Ref Range | 02/11/2014 01:52pm |
| TNCC                   | 24                             | /uL   | No Ref Range | 02/11/2014 01:52pm |
| CSF Micro Protein      | 89                             | mg/dL | No Ref Range | 02/11/2014 02:18pm |

CSF Analysis Specimen - Cerebrospinal Fluid

Sample ID This is a cytospin preparation of CSF. (239-49)

Lesion Description This is a moderately cellular preparation with a mixed cell population. There are 94% small lymphocytes and 6% macrophages present. No organisms or neoplastic cells observed. A rare RBC is noted.

***This Time Dated Report Supersedes All Previous Reports On This Clinical Pathology Request***

**Client**

WHITNEY YOUNG  
 MU VMTH SMALL ANIMAL RES.  
 900 E CAMPUS DR.  
 COLUMBIA, MO 65211

**Patient**

MCCARTNEY  
 DACHSHUND, LONGHAIRD STANDAR  
 MALE 0lb  
 CANINE 5M

Interpretation Consistent with moderate mononuclear pleocytosis.  
 Charles E. Wiedmeyer DVM, PhD, DACVP

| TEST                                                               | RESULT | UNITS | REF RANGE  | RESULT DATETIME    |
|--------------------------------------------------------------------|--------|-------|------------|--------------------|
| Small Animal Maxi Profile Specimen - Lithium Heparin - Whole Blood |        |       |            |                    |
| Glucose                                                            | 285 H  | mg/dL | 81 - 133   | 02/11/2014 02:12pm |
| Urea Nitrogen                                                      | 12     | mg/dL | 8 - 28     | 02/11/2014 02:12pm |
| Creatinine                                                         | 0.5 L  | mg/dL | .6 - 1.6   | 02/11/2014 02:12pm |
| Sodium                                                             | 143    | mEq/L | 143 - 152  | 02/11/2014 02:12pm |
| Potassium                                                          | 4.8    | mEq/L | 3.4 - 4.9  | 02/11/2014 02:12pm |
| Chloride                                                           | 103 L  | mEq/L | 108 - 117  | 02/11/2014 02:12pm |
| Total CO2                                                          | 25     | mEq/L | 18 - 26    | 02/11/2014 02:12pm |
| Anion Gap                                                          | 20     | mEq/L | 13 - 22    | 02/11/2014 02:12pm |
| Albumin                                                            | 3.3    | g/dL  | 2.9 - 4    | 02/11/2014 02:12pm |
| Total Protein                                                      | 6.2    | g/dL  | 5.2 - 7.4  | 02/11/2014 02:12pm |
| Globulin                                                           | 2.9    | g/dl  | 2.2 - 3.6  | 02/11/2014 02:12pm |
| Calcium                                                            | 11.2   | mg/dL | 9.2 - 11.3 | 02/11/2014 02:12pm |
| Phosphorus                                                         | 6.9 H  | mg/dL | 2 - 5      | 02/11/2014 02:12pm |
| Cholesterol                                                        | 193    | mg/dL | 133 - 338  | 02/11/2014 02:12pm |
| Total Bilirubin                                                    | 0.1    | mg/dL | .1 - .4    | 02/11/2014 02:12pm |
| ALT                                                                | 41     | U/L   | 9 - 58     | 02/11/2014 02:12pm |
| ALP                                                                | 52     | U/L   | 5 - 129    | 02/11/2014 02:12pm |
| GGT                                                                | 5      | U/L   | 0 - 5      | 02/11/2014 02:12pm |
| CK                                                                 | 108    | U/L   | 10 - 274   | 02/11/2014 02:12pm |

| TEST                                                        | RESULT | UNITS | REF RANGE | RESULT DATETIME    |
|-------------------------------------------------------------|--------|-------|-----------|--------------------|
| Cardiac Troponin-I Specimen - Lithium Heparin - Whole Blood |        |       |           |                    |
| Cardiac Troponin-I                                          | 0.20 H | ng/ml | 0 - .05   | 02/11/2014 04:28pm |

Small Animal Maxi Profile Specimen - Lithium Heparin - Whole Blood  
 Plasma/ Serum Condition CLEAR
